# Supplementary material for: Quantitative trait locus mapping and candidate gene analysis for salt tolerance at bud stage in rice
Source: PubMed Central journal article supplement (PMC9886062; doi:10.3389/fpls.2022.1041081), 2023-01-16
Supplement: DataSheet_1.pdf [file DataSheet_1.pdf]

ADDITIONAL FILE FIGURE TABLE

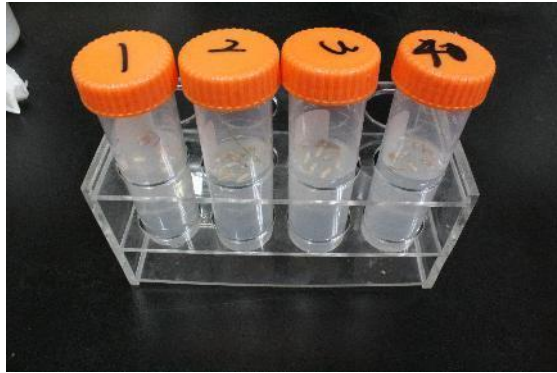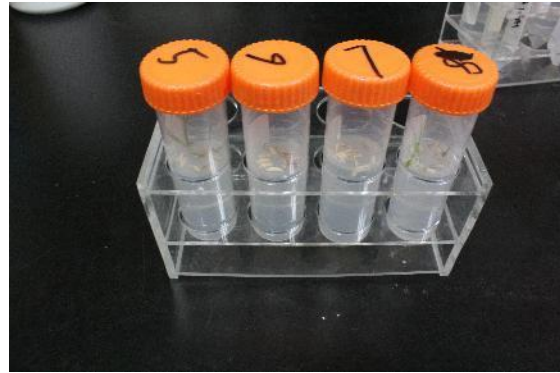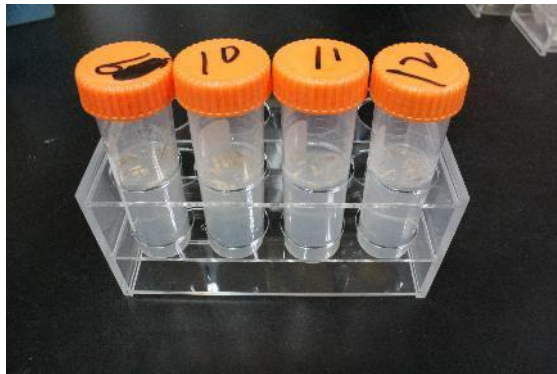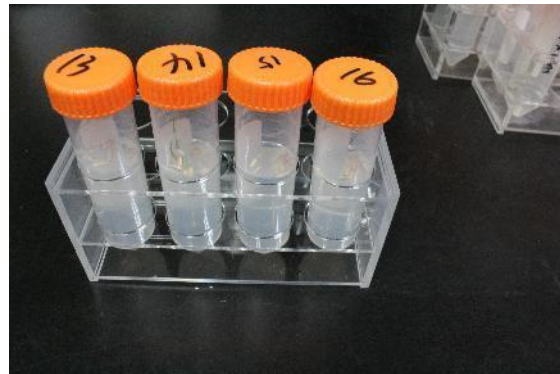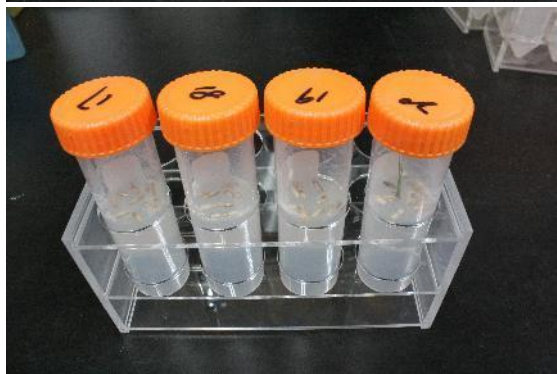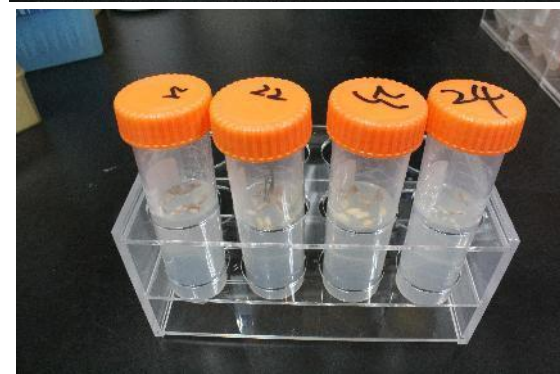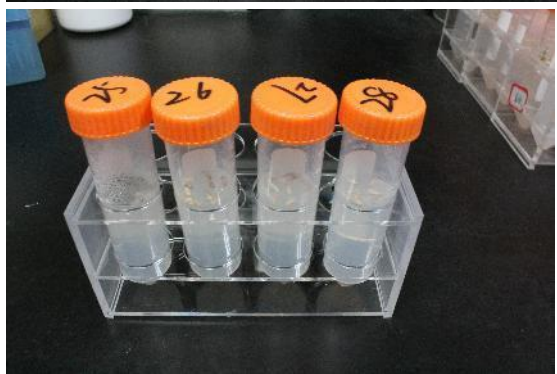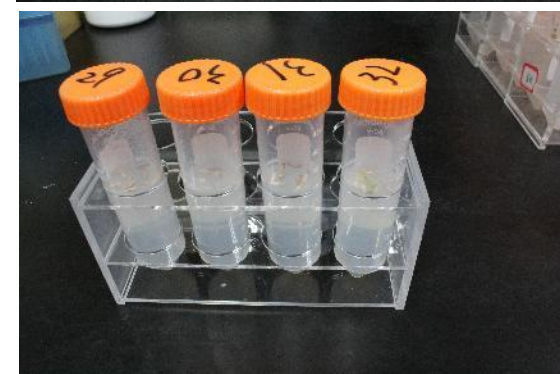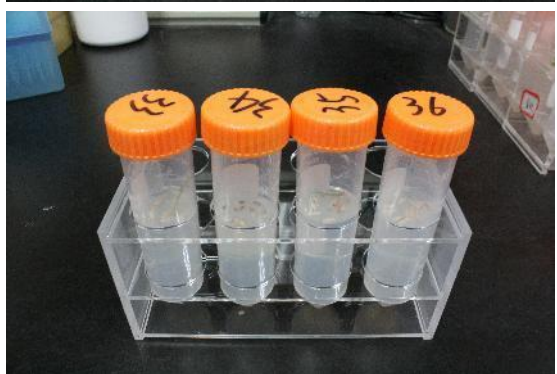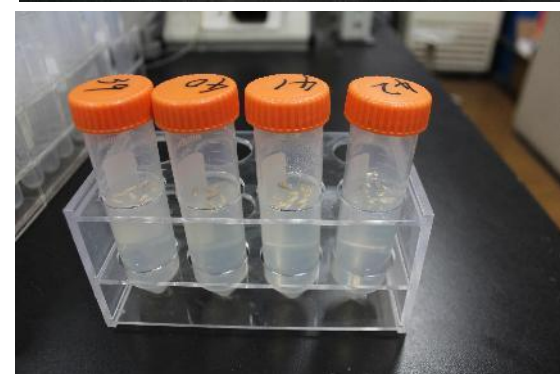

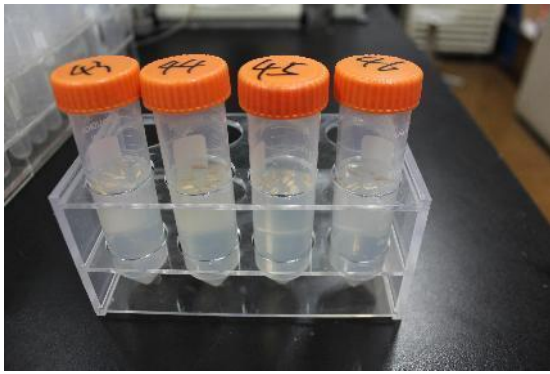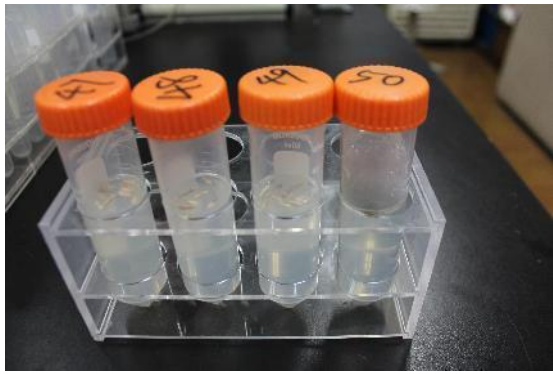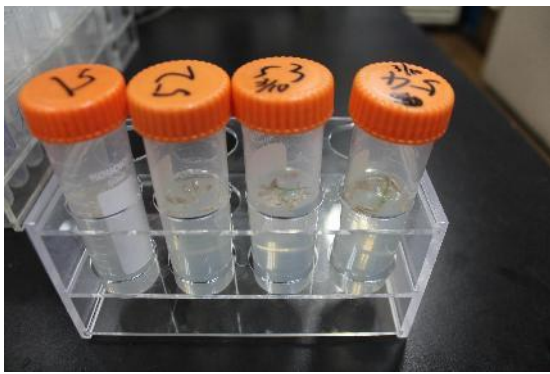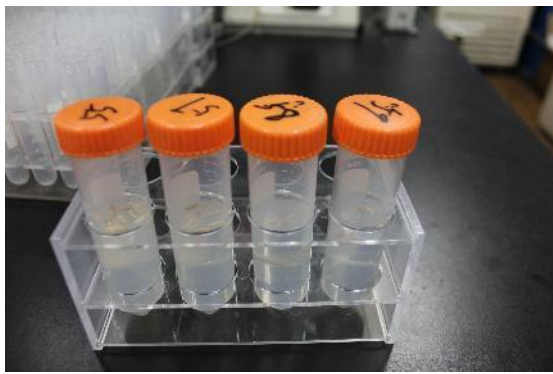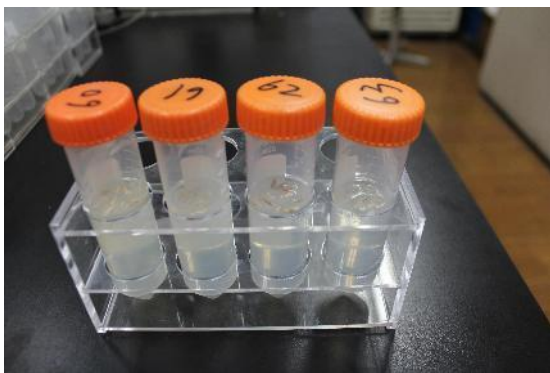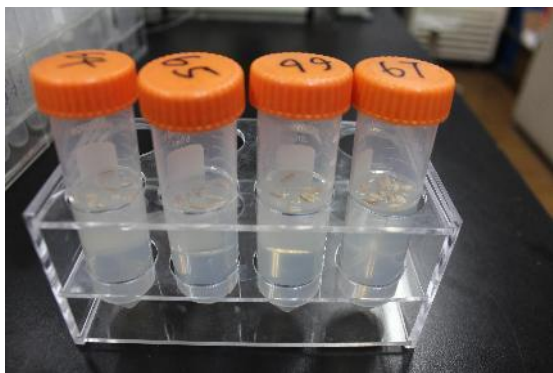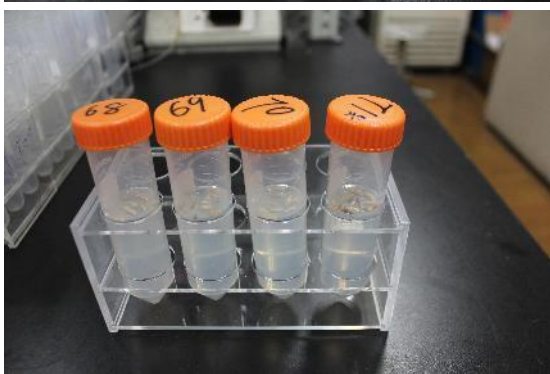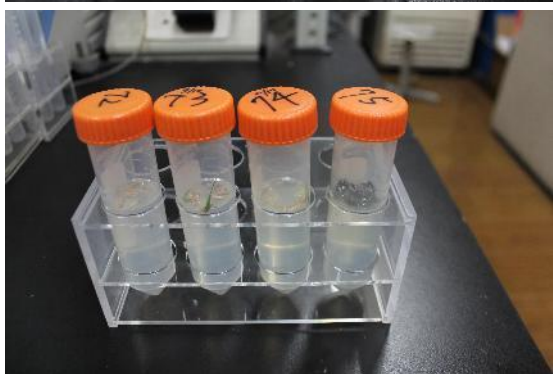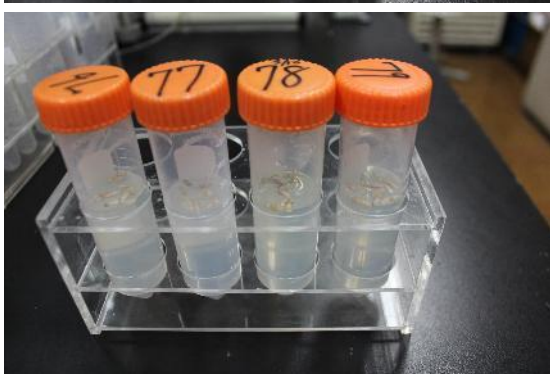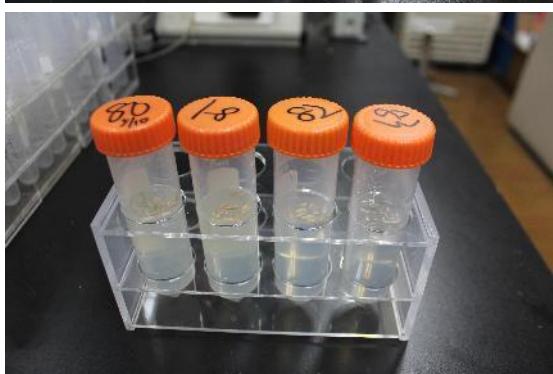

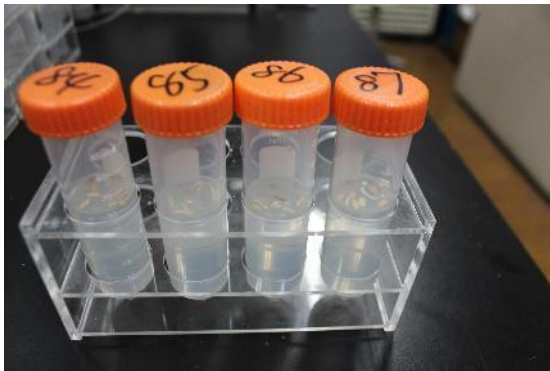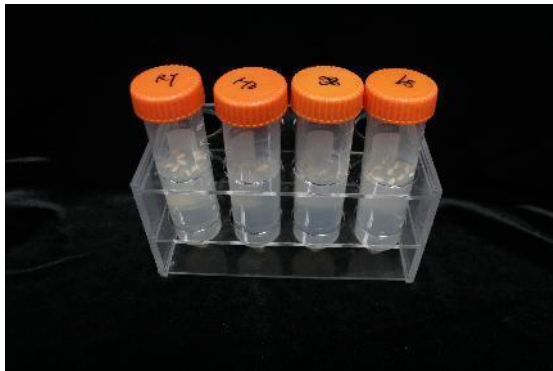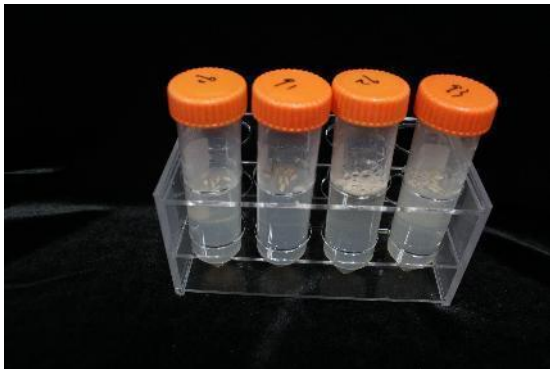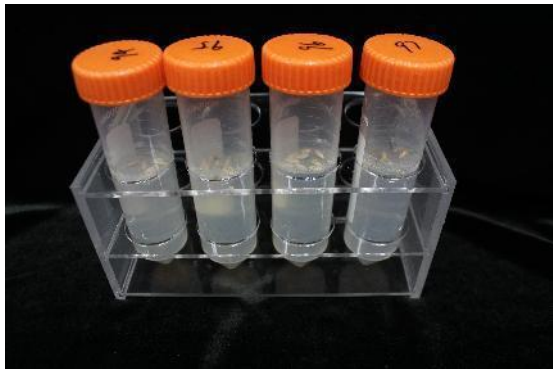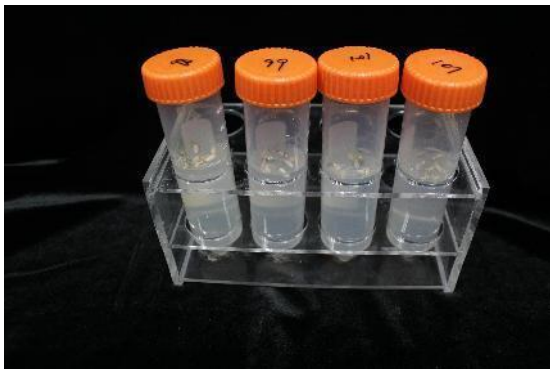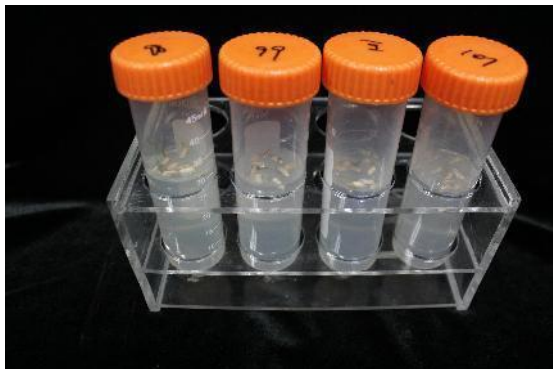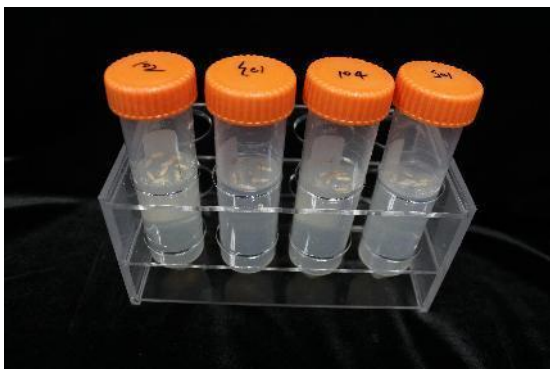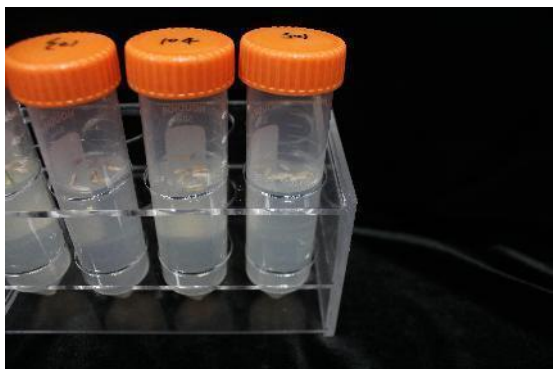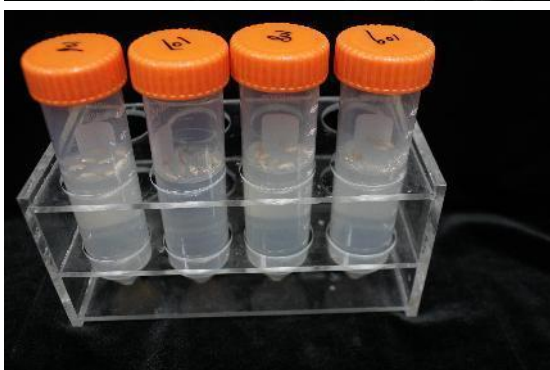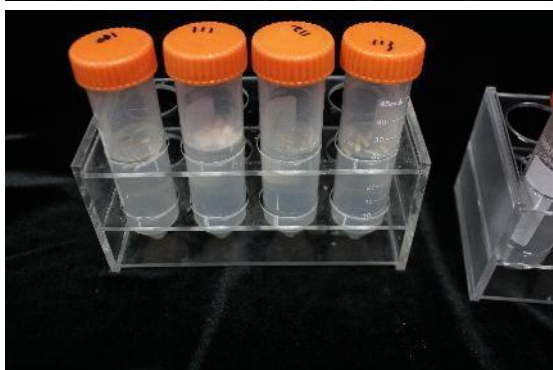

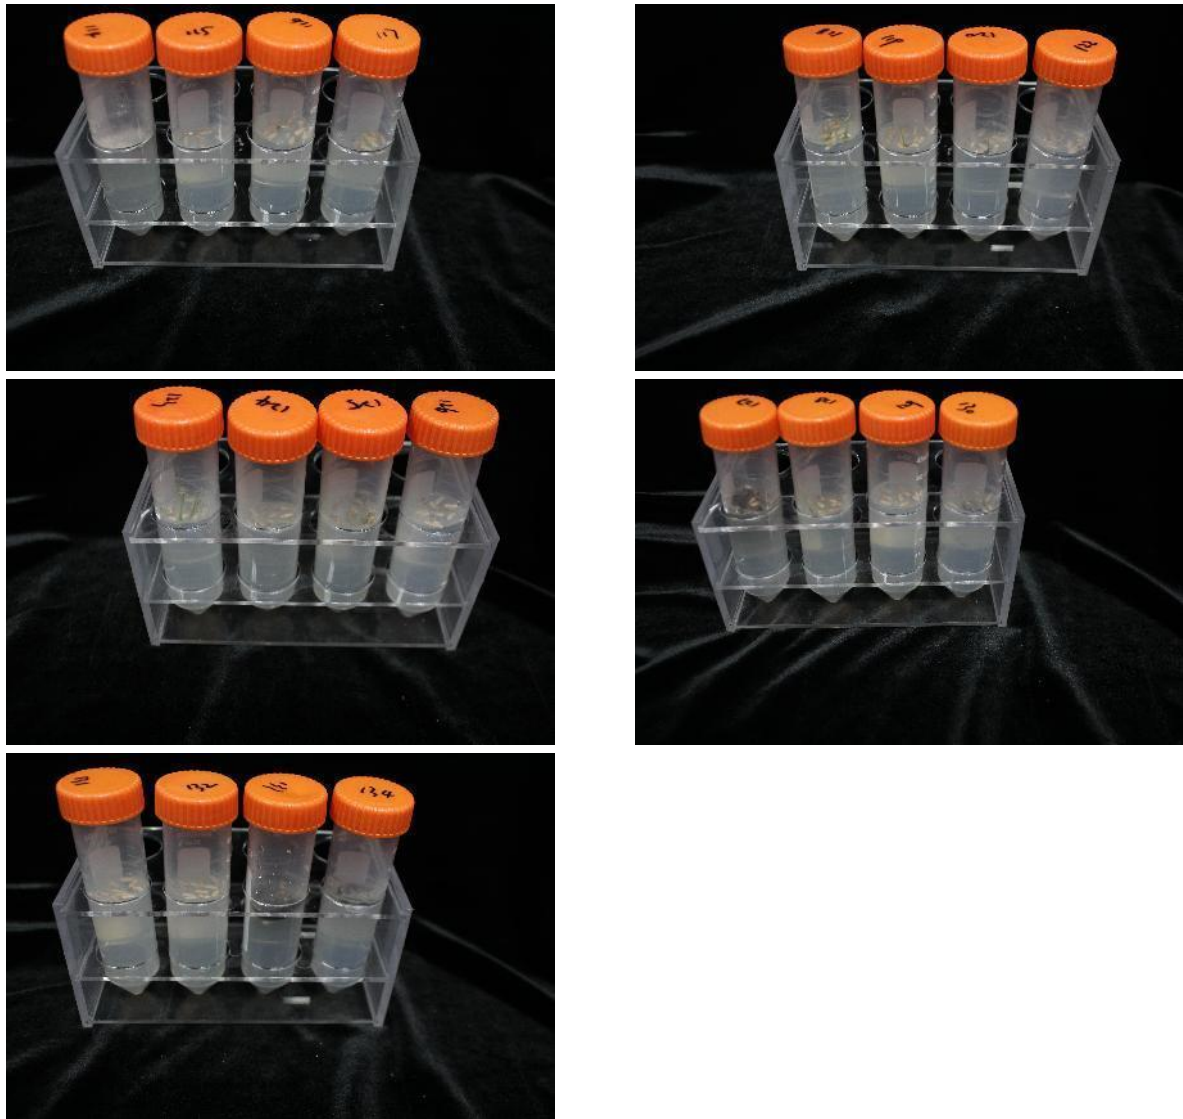

**Figure S1.** Phenotypes of both parents and RIL populations treated with 80mM NaCl.

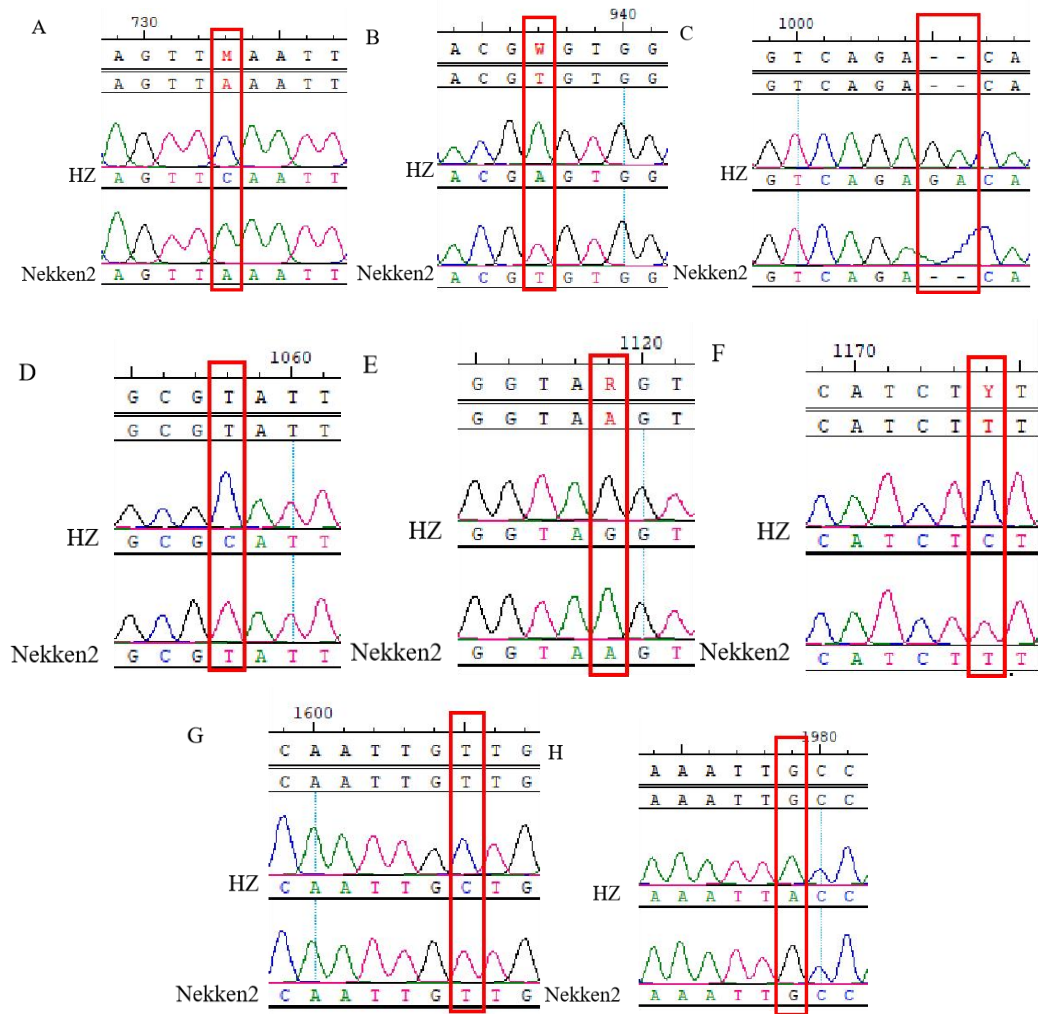

**Figure S2.** Sequencing of *LOC\_Os12g25200* promoter region.

**Table S1.** SSR markers selected to identify the CSSLs.

| Chromosome | SSR markers                                                                                                                        |
|------------|------------------------------------------------------------------------------------------------------------------------------------|
| Chr.01     | RM3252, RM1247, RM3740, RM6902, RM8111, RM6786, RM583, RM580, RM259, RM493, RM6880, RM8097, RM6703, RM3738, RM1361, RM8100, RM6321 |
| Chr.02     | RM7581, RM300, RM262, RM3515, RM6318, RM1920, RM3763, RM6933, RM3316                                                               |
| Chr.03     | RM14795, RM6676, RM3513, RM1350, RM3856, RM5172                                                                                    |
| Chr.04     | RM8213, RM307, RM16874, RM1155, RM6997, RM3524, RM3839, RM303, RM317, RM349, RM1113                                                |
| Chr.05     | RM17713, RM17798, RM13, RM17954, RM18384, RM3437, RM430, RM3695, RM18751, RM3476, RM6972, RM3616, RM3809, RM334, RM19221           |
| Chr.06     | RM19234, RM585, RM217, RM276, RM19715, RM2523, RM3183, RM3496, RM162, RM5371, RM6395, RM3343, RM412                                |
| Chr.07     | RM5490, RM5055, RM5711, RM6574, RM3755, RM6835, RM11, RM3826, RM1132, RM234, RM3555, RM1306                                        |
| Chr.08     | RM1019, RM6356, RM3819, RM5556, RM7285, RM5808, RM556, RM80, RM3571                                                                |
| Chr.09     | RM444, RM219, RM1328, RM6051, RM3700, RM242, RM201, RM3744                                                                         |
| Chr.10     | RM6370, RM2125, RM4455, RM5689, RM1375, RM1873, RM6737, RM3451, RM4771                                                             |
| Chr.11     | RM286, RM167, RM4504, RM6272, RM6094                                                                                               |
| Chr.12     | RM5795, RM247, RM101, RM1337, RM1986, RM7376, RM1103, RM5479, RM3739, RM1226                                                       |

**Table S2.** Primers used in the study.

| QTL            | Gene ID               | Forward primer (5'→3') | Downstream primer (5'→3') |
|----------------|-----------------------|------------------------|---------------------------|
|                | <i>OsActin</i>        | TGGCATCTCAGCACATTCC    | TGCACAATGGATGGGTCAGA      |
| <i>qST3</i>    | <i>LOC_Os03g12820</i> | CCGTCGACAACCTTGAGAAT   | AGGGAACATGTCGCGAGTAG      |
| <i>qST3</i>    | <i>LOC_Os03g12840</i> | ACGAGGAGGAAGTGGTGATG   | ATCAAATGGGCCTTGTTCTG      |
| <i>qST9</i>    | <i>LOC_Os09g37949</i> | TCCACGAGATTGAGTTGCTG   | ACACTGATCGGCAGATTTCC      |
| <i>qST9</i>    | <i>LOC_Os09g38000</i> | TCCGGAGTGGTATTTCTTCG   | GACCAGCGTCTTCTTCATCC      |
| <i>qST10.2</i> | <i>LOC_Os10g01480</i> | ACTAACGTTGCCCTTGGTTG   | TGCCATCATTGTTTTCCAGA      |
| <i>qST10.2</i> | <i>LOC_Os10g01760</i> | TTCCTCCACCTCGTCTCTTC   | GGCACGTCTCGTCGTAGAAT      |
| <i>qST11.1</i> | <i>LOC_Os11g10590</i> | CACTAAGATGGCGGTGGTG    | GGACGAAACATGCAAAAACC      |
| <i>qST11.1</i> | <i>LOC_Os11g10640</i> | TGGAACATCACCTGTTTGGGA  | TGTATGAATCGTGCGGGTTA      |
| <i>qST12.1</i> | <i>LOC_Os12g10660</i> | GTCATCGTCAGCCCAACAAG   | GCTGGAGGAGTGAGGTTTCAG     |
| <i>qST12.1</i> | <i>LOC_Os12g10740</i> | CCTTGAGCAAGCTCCAAAAC   | GGAAGTCCCTCCAGTGAGCTG     |
| <i>qST12.2</i> | <i>LOC_Os12g12860</i> | CTGGGAGAAGCAGTCAGGTC   | AAGTGCCCCTTCTTTTTGGT      |
| <i>qST12.2</i> | <i>LOC_Os12g13570</i> | AGTGCTGCCAAAAGCTTCAT   | TCGCTCAATACGCAAACTG       |
| <i>qST12.3</i> | <i>LOC_Os12g24800</i> | ATGGAAACGAGGATAGTGGT   | CTTATTGTTGTGCGAGAAGT      |
| <i>qST12.3</i> | <i>LOC_Os12g25200</i> | AGGAGATGGGGATGTACGTG   | ATCTCGGGTCCTTGGA ACTT     |
